# Supplementary material
Source: MDPI journal article supplement (https://www.mdpi.com/2076-3417/13/3/1254)
Supplement: s1 [file s1]

### Sample chromatogram

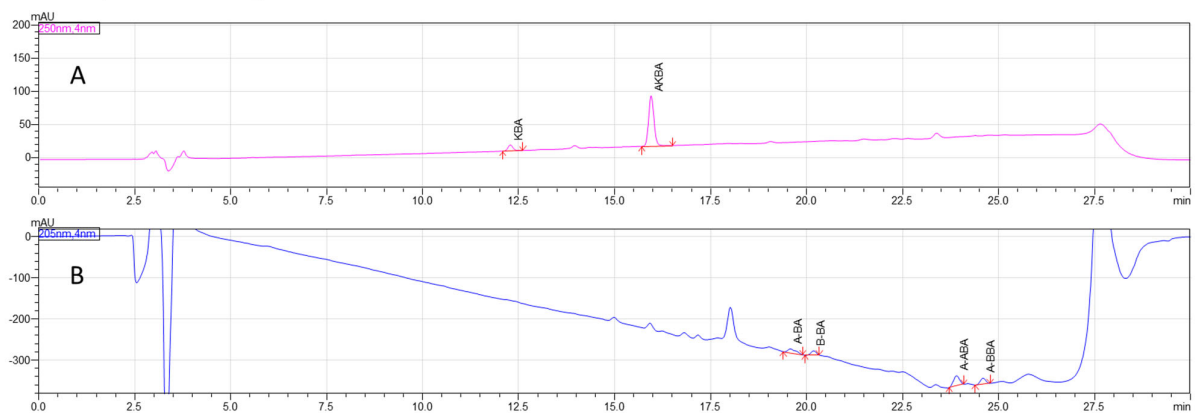

Figure S1. HPLC chromatogram registered at 250 nm (A) and 205 nm (B) for a sample of *B. carterii*

### Standard chromatogram

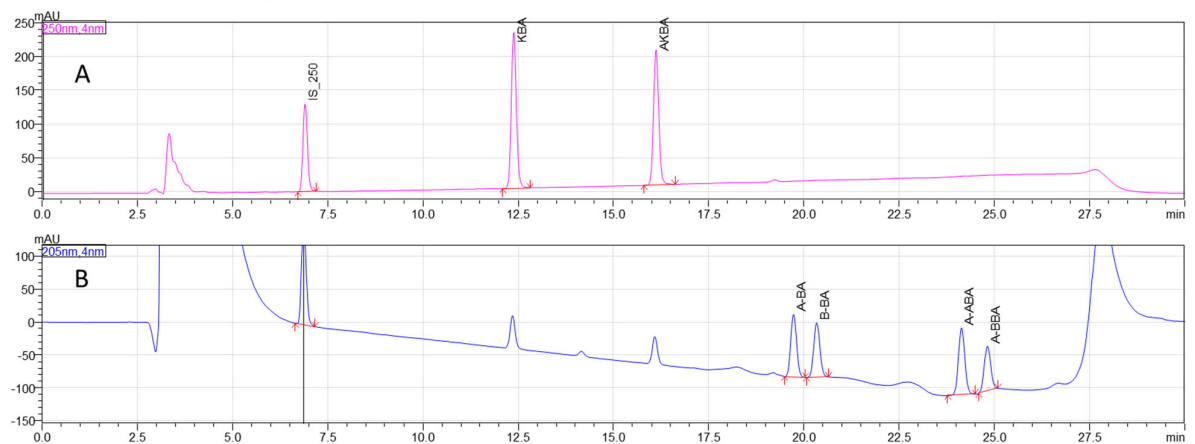

Figure S2. HPLC chromatogram registered at 250 nm (A) and 205 nm (B) for 50 mg/L standard mix

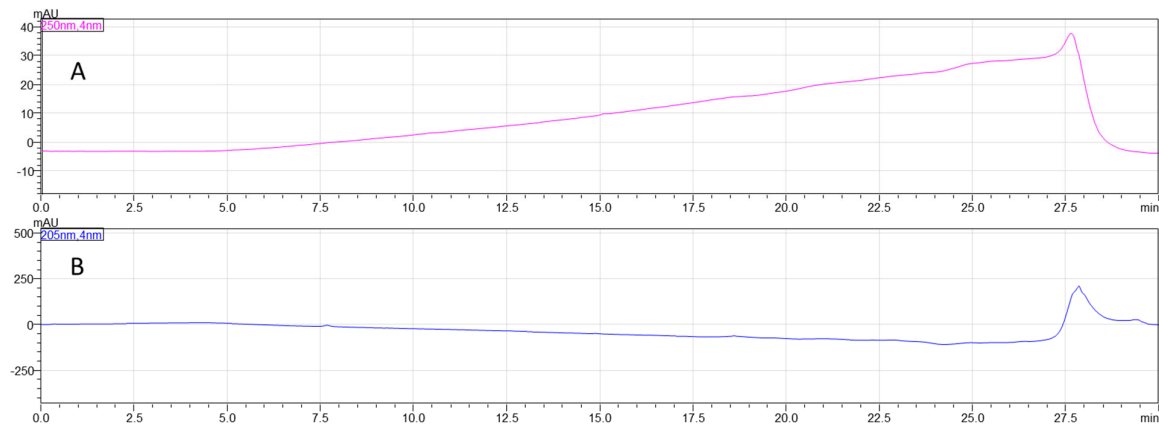

Figure S3. HPLC chromatogram registered at 250 nm (A) and 205 nm (B) for the blank
